# Supplementary material for: The neurological symptoms of COVID-19: a systematic overview of systematic reviews, comparison with other neurological conditions and implications for healthcare services
Source: PubMed Central journal article supplement — Ther Adv Chronic Dis. 2021 Jan 28;12:2040622320976979. doi: 10.1177/2040622320976979 (PMC7970685; doi:10.1177/2040622320976979), 2021-01-28
Supplement: sj-pdf-1-taj-10.1177_2040622320976979.pdf [file sj-pdf-1-taj-10.1177_2040622320976979.pdf]

Table 1: Quality Assessment using CASP<sup>10</sup> Criteria

| Lead author/<br>CASP question | Q1 | Q2 | Q3     | Q4     | Q5 | Q6 | Q7 | Q8 | Q9 | Q10 | Fully<br>achieved |
|-------------------------------|----|----|--------|--------|----|----|----|----|----|-----|-------------------|
| Abdelaziz <sup>11</sup>       | y  | y  | y      | partly | y  | y  | y  | n  | y  | y   | 8                 |
| Abdullahi <sup>12</sup>       | y  | y  | y      | y      | y  | y  | y  | n  | y  | y   | 9                 |
| Abu-Rumeileh <sup>13</sup>    | y  | y  | y      | y      | y  | y  | y  | n  | y  | y   | 9                 |
| Agyeman <sup>14</sup>         | y  | y  | y      | partly | y  | y  | y  | n  | y  | y   | 8                 |
| Almqvist <sup>15</sup>        | y  | y  | y      | y      | y  | y  | y  | n  | y  | y   | 9                 |
| Asadi-Pooya <sup>16</sup>     | y  | y  | partly | y      | y  | y  | y  | n  | y  | y   | 8                 |
| Bhatia <sup>17</sup>          | y  | y  | y      | y      | y  | y  | y  | n  | y  | y   | 9                 |
| Carrillo-Larco <sup>18</sup>  | y  | y  | y      | y      | y  | y  | y  | n  | y  | y   | 9                 |
| Ceravolo <sup>19</sup>        | y  | y  | y      | y      | y  | y  | y  | n  | y  | y   | 9                 |
| Collantes <sup>20</sup>       | y  | y  | y      | y      | y  | y  | y  | n  | y  | y   | 9                 |
| Correia <sup>21</sup>         | y  | y  | y      | y      | y  | y  | y  | n  | y  | y   | 9                 |
| Di Carlo <sup>22</sup>        | y  | y  | y      | y      | y  | y  | y  | n  | y  | y   | 9                 |
| Dinakaran <sup>23</sup>       | y  | y  | y      | y      | y  | y  | y  | n  | y  | y   | 9                 |
| Fatima <sup>24</sup>          | y  | y  | y      | y      | y  | y  | y  | n  | y  | y   | 9                 |
| Ghannam <sup>25</sup>         | y  | y  | y      | y      | y  | y  | y  | n  | y  | y   | 9                 |
| Gittermann <sup>26</sup>      | y  | y  | y      | y      | y  | y  | y  | n  | y  | y   | 9                 |
| Katal <sup>27</sup>           | y  | y  | y      | y      | y  | y  | y  | n  | y  | y   | 9                 |
| Katyal <sup>28</sup>          | y  | y  | y      | y      | y  | y  | y  | n  | y  | y   | 9                 |
| Leonardi <sup>29</sup>        | y  | y  | y      | y      | y  | y  | y  | n  | y  | y   | 9                 |
| Liguoro <sup>30</sup>         | y  | y  | y      | y      | y  | y  | y  | n  | y  | y   | 9                 |
| Montalvan <sup>31</sup>       | y  | y  | y      | partly | y  | y  | y  | n  | y  | y   | 8                 |
| Narula <sup>32</sup>          | y  | y  | y      | y      | y  | y  | y  | n  | y  | y   | 9                 |
| Nepal <sup>33</sup>           | y  | y  | y      | y      | y  | y  | y  | n  | y  | y   | 9                 |
| Orru <sup>34</sup>            | y  | y  | y      | partly | y  | y  | y  | n  | y  | y   | 8                 |
| Paliwali <sup>35</sup>        | y  | y  | y      | partly | y  | y  | y  | n  | y  | y   | 8                 |
| Panda <sup>36</sup>           | y  | y  | y      | y      | y  | y  | y  | n  | y  | y   | 9                 |
| Pinzon <sup>37</sup>          | y  | y  | y      | y      | y  | y  | y  | n  | y  | y   | 9                 |
| Pousa <sup>38</sup>           | y  | y  | y      | y      | y  | y  | y  | n  | y  | y   | 9                 |
| Raschetti <sup>39</sup>       | y  | y  | y      | y      | y  | y  | y  | n  | y  | y   | 9                 |
| Rogers <sup>40</sup>          | y  | y  | y      | y      | y  | y  | y  | n  | y  | y   | 9                 |
| Scoppettuolo <sup>41</sup>    | y  | y  | y      | y      | y  | y  | y  | n  | y  | y   | 9                 |
| Sharifan <sup>42</sup>        | y  | y  | y      | y      | y  | y  | y  | n  | y  | y   | 9                 |
| Taherifard <sup>43</sup>      | y  | y  | y      | y      | y  | y  | y  | n  | y  | y   | 9                 |
| Tan <sup>44</sup>             | y  | y  | y      | y      | y  | y  | y  | n  | y  | y   | 9                 |
| Trevisanuto <sup>45</sup>     | y  | y  | y      | y      | y  | y  | y  | n  | y  | y   | 9                 |
| Tsai <sup>46</sup>            | y  | y  | y      | y      | y  | y  | y  | n  | y  | y   | 9                 |
| Tsivgoulis <sup>47</sup>      | y  | y  | y      | partly | y  | y  | y  | n  | y  | y   | 8                 |
| Uncini <sup>48</sup>          | y  | y  | y      | y      | y  | y  | y  | n  | y  | y   | 9                 |
| Valiuddin <sup>49</sup>       | y  | y  | y      | y      | y  | y  | y  | n  | y  | y   | 9                 |
| Vonck <sup>50</sup>           | y  | y  | y      | y      | y  | y  | y  | n  | y  | y   | 9                 |
| Wang <sup>51</sup>            | y  | y  | y      | y      | y  | y  | y  | n  | y  | y   | 9                 |
| Werner <sup>52</sup>          | y  | y  | y      | y      | y  | y  | y  | n  | y  | y   | 9                 |
| Whittaker <sup>53</sup>       | y  | y  | y      | partly | y  | y  | y  | n  | y  | y   | 8                 |
| Wilson <sup>54</sup>          | y  | y  | partly | partly | y  | y  | y  | n  | y  | y   | 7                 |
| Zahra <sup>55</sup>           | y  | y  | y      | y      | y  | y  | y  | n  | y  | y   | 9                 |

- Q1 Did the review address a clearly focused question?
- Q2 Did the authors look for the right type of papers?
- Q3 Do you think all the important, relevant studies were included?
- Q4 Did the review's authors do enough to assess quality of the included studies?
- Q5 If the results of the review have been combined, was it reasonable to do so?
- Q6 What are the overall results of the review? (are they clear?)
- Q7 How precise are the results?
- Q8 Can the results be applied to the local population?
- Q9 Were all important outcomes considered?
- Q10 Are the benefits worth the harms and costs?
