# Supplementary material for: The neurological symptoms of COVID-19: a systematic overview of systematic reviews, comparison with other neurological conditions and implications for healthcare services
Source: PubMed Central journal article supplement — Ther Adv Chronic Dis. 2021 Jan 28;12:2040622320976979. doi: 10.1177/2040622320976979 (PMC7970685; doi:10.1177/2040622320976979), 2021-01-28
Supplement: sj-pdf-5-taj-10.1177_2040622320976979.pdf [file sj-pdf-5-taj-10.1177_2040622320976979.pdf]

Table 54: Comparison between neurological symptoms in COVID-19, FND and CFS

| Neurological symptoms in:   |                                                                                               |                                                         |
|-----------------------------|-----------------------------------------------------------------------------------------------|---------------------------------------------------------|
| COVID-19                    | FND                                                                                           | CFS                                                     |
| Acute CVD (a)               | no                                                                                            | no                                                      |
| Encephalitis (c)            | no                                                                                            | no                                                      |
| Guillain-Barre syndrome (d) | no                                                                                            | no                                                      |
| Myelitis                    | no                                                                                            | no                                                      |
| Ondines Curse (g)           | no                                                                                            | no                                                      |
| Polyneuritis cranialis      | no                                                                                            | no                                                      |
| no                          | Bladder or bowel issues                                                                       | no                                                      |
| no                          | no                                                                                            | Chronic sore throat or sore glands that are not swollen |
| no                          | no                                                                                            | Flu-like symptoms                                       |
| no                          | no                                                                                            | Heart palpitations                                      |
| Altered mental status (b)   | no                                                                                            | Problems thinking, remembering or concentrating         |
| Dizziness                   | Dizziness                                                                                     | Dizziness                                               |
| Dysphagia                   | Dysphagia                                                                                     | no                                                      |
| Facial pain                 | Facial pain & spasms                                                                          | no                                                      |
| Fatigue                     | Fatigue                                                                                       | Fatigue                                                 |
| Headache                    | Headaches or migraines                                                                        | Headaches                                               |
| Hyposmia and/or hypogeusia  | Olfactory symptoms                                                                            | no                                                      |
| Mental Health Issues (e)    | Personality changes (e.g. irritability, depression)                                           | no                                                      |
| Muscle Issues (f)           | Movement disorders, limb weakness, speech symptoms (e.g. whispering, slurring or stuttering)  | Muscle or joint pain                                    |
| Neuralgia / polyneuropathy  | Altered sensation (e.g. numbness, pain)                                                       | no                                                      |
| Seizure (h)                 | Altered awareness episodes (e.g. dissociative or non-epileptic seizures, faints)              | no                                                      |
| Sensory Disturbances (i)    | Visual symptoms (e.g. loss of vision, double vision, seeing flashing lights) and hearing loss | no                                                      |
| Sleep issues (j)            | Sleep problems                                                                                | Sleep problems                                          |

\*These studies specifically looked only at these symptoms

(a) incl. strokes and blood clots thought to cause strokes

(b) incl. confusion

(c) incl. meningitis

(d) incl. Miller Fisher Syndrome

(e) incl. suicidal ideation, psychosis, anxiety, depression

(f) incl. myalgia, muscle injury, ataxia, spasms, dystonia

(g) fatal respiratory failure in sleep

(h) incl. epilepsy

(i) incl. amblyopia

(j) incl. insomnia
